# Supplementary material for: Type 2 diabetes prevalence and its risk factors in HIV: A cross-sectional study
Source: PubMed Central journal article supplement (PMC5847234; doi:10.1371/journal.pone.0194199), 2018-03-12
Supplement: pone.0194199.s001.pdf [file pone.0194199.s001.pdf]

**S1 Table. Sensitivity Analysis for 2005 Sample (n=337) Compared With Total Cohort (n=1021).**

|                |                        | <sup>†</sup> 2005 SAMPLE<br>n=337 | <sup>††</sup> TOTAL COHORT<br>n=1021 | <i>p</i>           |
|----------------|------------------------|-----------------------------------|--------------------------------------|--------------------|
| TOTAL          | n                      | 337                               | 1021                                 |                    |
| GENDER         | Male                   | 260 (77.2%)                       | 764 (74.8%)                          | 0.265 <sup>a</sup> |
| AGE            | Mean years             | 41.7                              | 40.4                                 | 0.134 <sup>b</sup> |
| ETHNICITY      | White                  | 184 (54.6%)                       | 512 (50.1%)                          | 0.407 <sup>a</sup> |
| BMI            | Mean kg/m <sup>2</sup> | 25.8                              | 25.5                                 | 0.835 <sup>b</sup> |
| WAIST          | Mean cm                | 91.3                              | 90.1                                 | 0.132 <sup>b</sup> |
| HYPERTENSION   | n                      | 66 (19.6%)                        | 192 (18.8%)                          | 0.891 <sup>a</sup> |
| LIPIDS (mean)  | Total Cholesterol      | 4.8                               | 4.7                                  | 0.794 <sup>b</sup> |
|                | Triglycerides          | 1.8                               | 1.7                                  | 0.237 <sup>b</sup> |
| CURRENT SMOKER | n                      | 120 (35.6%)                       | 378 (37.0%)                          | 0.326 <sup>a</sup> |
| CVD            | n                      | 9 (2.7%)                          | 32 (3.1%)                            | 0.563 <sup>a</sup> |
| STATIN USE     | n                      | 54 (16.0%)                        | 129 (12.6%)                          | 0.268 <sup>a</sup> |
| HIV DURATION   | Mean years             | 6.3                               | 6.5                                  | 0.249 <sup>b</sup> |
| ARV NAIVE      | n                      | 66 (19.6%)                        | 223 (21.8%)                          | 0.426 <sup>a</sup> |
| LIPODYSTROPHY  | n                      | 92 (27.3%)                        | 216 (21.2%)                          | 0.336 <sup>a</sup> |
| HEPATITIS B    | n                      | 15 (4.5%)                         | 50 (4.9%)                            | 0.981 <sup>a</sup> |
| HEPATITIS C    | n                      | 12 (3.6%)                         | 34 (3.3%)                            | 0.831 <sup>a</sup> |

Notes:

<sup>†</sup> Participants where glycaemia was measured

<sup>††</sup> Total sample including where glycaemia was not measured

<sup>a</sup> Significance of difference by Chi-squared

<sup>b</sup> Significance of difference by ANOVA
