# Supplementary material for: Type 2 diabetes prevalence and its risk factors in HIV: A cross-sectional study
Source: PubMed Central journal article supplement (PMC5847234; doi:10.1371/journal.pone.0194199), 2018-03-12

**S1 Fig. Consort Diagram for Recruitment of Participants in 2015.**

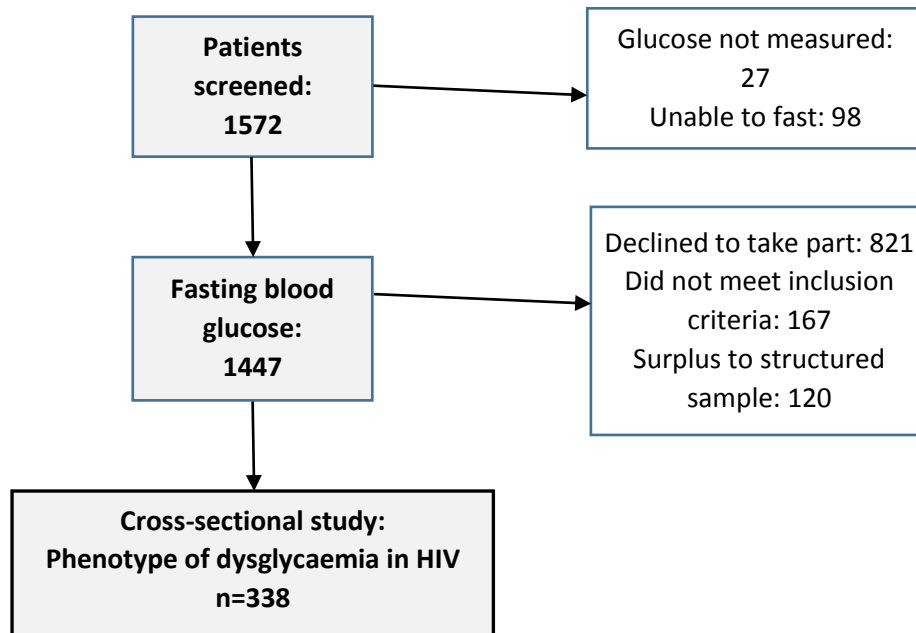

Supplement: pone.0194199.s002.pdf [file pone.0194199.s002.pdf]
